# Supplementary material
Source: Springer Nature journal article supplement (https://www.springermedizin.de/resource/supplementary/12874_2005_119_MOESM3_ESM.pdf/9433808)

Chronic/idiopathic

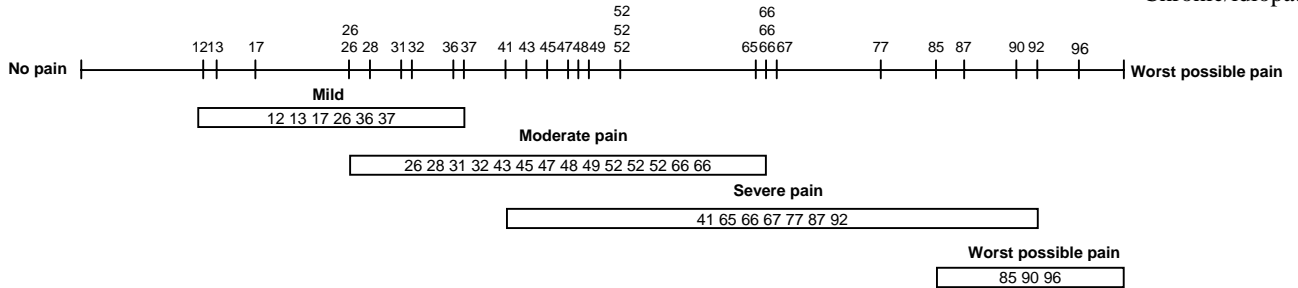

Nociceptive

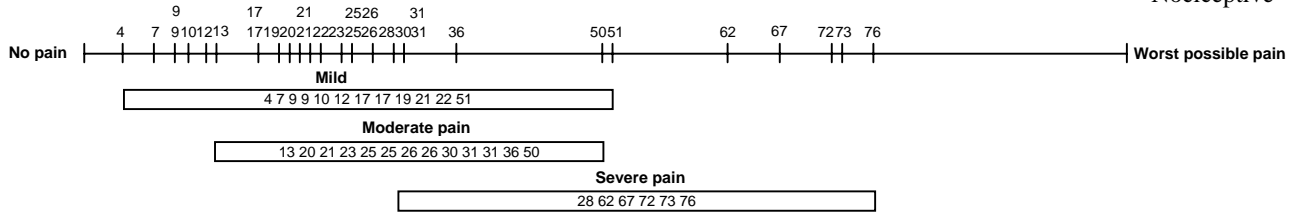

Neuropathic

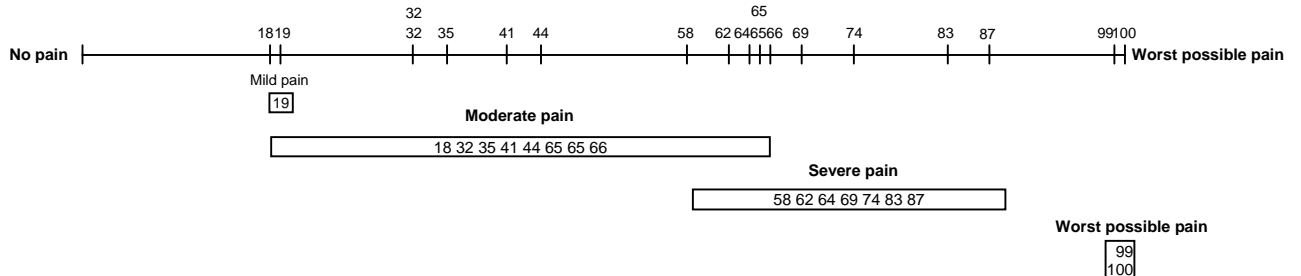

Supplement: MOESM3 [file 9433808]
